# Supplementary material for: Long-Term Persistence of Cell-Mediated and Humoral Responses to A(H1N1)pdm09 Influenza Virus Vaccines and the Role of the AS03 Adjuvant System in Adults during Two Randomized Controlled Trials
Source: PubMed Central journal article supplement (PMC5461372; doi:10.1128/cvi.00553-16), 2017-06-05
Supplement: CVI.00553-16_zcd999095487s2.pdf [file CVI.00553-16_zcd999095487s2.pdf]

**Supplementary Table 1. Serious adverse events (SAEs) reported during the follow-up period through Month 12.**

| Study | Treatment              | Age at onset (years) | Gender | Description <sup>1</sup>                  | Dose | Day of onset <sup>2</sup> | Duration (days) | Outcome                   |
|-------|------------------------|----------------------|--------|-------------------------------------------|------|---------------------------|-----------------|---------------------------|
| A     | H1N1/AS03 (3.75 µg HA) | 27                   | F      | Ectopic pregnancy                         | 2    | 326                       | 31              | Resolved                  |
|       |                        | 57                   | M      | Spinal osteoarthritis                     | 2    | 106                       | 288             | Resolved                  |
|       | H1N1 (15 µg HA)        | 41                   | M      | Migraine <sup>3</sup>                     | 1    | 14                        | 1               | Resolved                  |
| B     | H1N1/AS03 (3.75 µg HA) | 59                   | F      | Balance disorder                          | 2    | 293                       | -               | Not resolved <sup>4</sup> |
|       |                        | 21                   | F      | Spontaneous abortion                      | 2    | 152                       | 2               | Resolved                  |
|       |                        | 60                   | F      | Breast cancer                             | 2    | 85                        | 130             | Resolved                  |
|       |                        | 59                   | M      | Open wound*                               | 2    | 315                       | 72              | Resolved                  |
|       |                        | 60                   | M      | Renal disorder*                           | 2    | 341                       | 46              | Resolved                  |
|       | H1N1 (3.75 µg HA)      | 60                   | M      | Sepsis*                                   | 2    | 341                       | 46              | Resolved                  |
|       |                        | 23                   | F      | Asthma                                    | 2    | 165                       | 12              | Resolved                  |
|       |                        | 61                   | M      | Benign prostatic hyperplasia <sup>#</sup> | 2    | 297                       | 20              | Resolved                  |
|       |                        | 61                   | M      | Calculus ureteric <sup>#</sup>            | 2    | 297                       | 20              | Resolved                  |
|       |                        | 61                   | M      | Nephrolithiasis <sup>#</sup>              | 2    | 297                       | 20              | Resolved                  |
|       |                        | 21                   | M      | Radius fracture                           | 2    | 95                        | 105             | Resolved                  |
|       |                        | 47                   | F      | Ligament rupture                          | 2    | 127                       | -               | Resolving <sup>4</sup>    |

H1N1, A(H1N1)pdm09 vaccine. HA, hemagglutinin. M, male. F, female. <sup>1</sup>SAEs marked with the same symbol (\* or #) were reported by the same subject. <sup>2</sup>Number of days since last study vaccine dose. <sup>3</sup>Reported previously in (1). <sup>4</sup>Status in February 2011 (reporting date).

## Reference

1. **Roman F, Clément F, Dewé W, Walravens K, Maes C, Willekens J, De Boever F, Hanon E, Leroux-Roels G.** 2011. Effect on cellular and humoral immune responses of the AS03 Adjuvant System in an A/H1N1/2009 influenza virus vaccine administered to adults during two randomized controlled trials. *Clin Vaccine Immunol* 18:835-843.
